# Supplementary material
Source: PubMed Central journal article supplement (PMC3489930)
Supplement: NIHMS409053-supplement-1_si_001.pdf [file NIHMS409053-supplement-1_si_001.pdf]

# Rapid Quantification of the Activating Effects of Hydrogen Bonding Catalysts with a Colorimetric Sensor

Phuong N. H. Huynh, Ryan R. Walvoord, and Marisa C. Kozlowski\*

Department of Chemistry, Roy and Diana Vagelos Laboratories, University of Pennsylvania, Philadelphia, Pennsylvania 19104-6323, USA

## Supporting information

|                                                                                                                                |         |
|--------------------------------------------------------------------------------------------------------------------------------|---------|
| 1. General information.....                                                                                                    | S2      |
| 2. Synthesis of sensor .....                                                                                                   | S2      |
| 3. Synthesis of catalysts.....                                                                                                 | S3-S5   |
| 4. UV titration of sensor with catalysts .....                                                                                 | S6-S12  |
| 5. Rate measurements of the Diels-Alder reactions of methyl vinyl ketone (MVK) and cyclopentadiene (Cp)<br>with catalysts..... | S12-S24 |
| 6. References .....                                                                                                            | S24     |

## 1. General information

All non-aqueous reactions were carried out under an atmosphere of argon. All glassware was put in the oven at 85-90 °C overnight and flame-dried before use. The solvents for the reactions and all measurements were freshly distilled prior to use. <sup>1</sup>H-NMR spectra were recorded on Bruker AVII500B (500 MHz), Uni500 (500 MHz) or DMX-300 (300 MHz) spectrometers. NMR spectroscopic data were reported as follows: chemical shift, multiplicity (s = singlet, d = doublet, q = quartet, b = broad, m = multiplet), coupling constants and number of protons and compared with the references. All the UV spectra were taken on a JASCO FT/IR-480 Plus from 700 nm – 380 nm.

## 2. Synthesis of the sensor

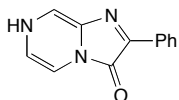

### 2-Phenylimidazo[1,2-a]pyrazin-3(7H)-one.

The title compound was prepared by a previously described procedure.<sup>1</sup> Spectral data are in good agreement with literature values. <sup>1</sup>H NMR (500 MHz, DMSO-*d*<sub>6</sub>) δ 11.32 (bs, 1H), 8.47 (d, *J* = 7.7 Hz, 2H), 8.05 (s, 1H), 7.41-7.44 (m, 3H), 7.34 (t, *J* = 7.1 Hz, 1H), 6.89 (bd, *J* = 4.8 Hz, 1H).

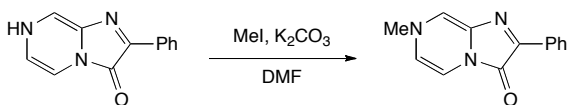

### 7-Methyl-2-phenylimidazo[1,2-a]pyrazin-3(7H)-one.

To a solution of 2-phenylimidazo[1,2-a]pyrazin-3(7H)-one (106 mg, 0.50 mmol) in DMF (0.6 mL) were added MeI (94 μL, 1.51 mmol) and K<sub>2</sub>CO<sub>3</sub> (209 mg, 1.51 mmol), and the resulting solution was stirred at room temperature for 25 min. The reaction was then diluted with CH<sub>2</sub>Cl<sub>2</sub> (20 mL), washed with H<sub>2</sub>O (2 x 10 mL), brine (1 x 10 mL), dried over Na<sub>2</sub>SO<sub>4</sub>, filtered and concentrated. Purification by chromatography (gradient 4-10% MeOH:CH<sub>2</sub>Cl<sub>2</sub>) provided the title compound as a red solid (61 mg, 54%). Spectral data are in good agreement with literature values.<sup>2</sup> <sup>1</sup>H NMR (500 MHz, DMSO-*d*<sub>6</sub>) δ 8.46 (d, *J* = 7.8 Hz, 2H), 8.08 (s, 1H), 7.50 (d, *J* = 5.9 Hz, 1H), 7.44 (t, *J* = 7.7 Hz, 2H), 7.33 (td, *J* = 7.3, 1.2 Hz, 1H), 6.86 (dt, *J* = 5.8, 1.2 Hz, 1H), 3.64 (s, 3H).

### 3. Synthesis of catalysts

*N,N'*-diphenylthiourea (**2**) and (*R*)-BINOL (**3**) are commercially available.

*N,N'*-di(3,5-bis(trifluoromethyl)phenyl)thiourea<sup>3</sup> and monoaminidinium BArFate salt<sup>4</sup> are known compounds. The <sup>1</sup>H-NMR spectra matched those in reported.

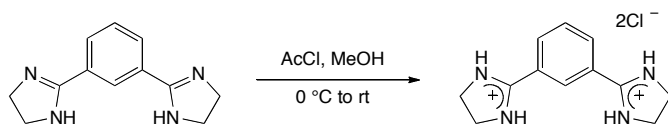

#### Bisamidinium Chloride.

Dry MeOH (2.0 mL) was added to a dry flask under and cooled to 0 °C. Acetyl chloride (2.0 mL) was then added dropwise, and the solution was stirred for 1 h, warmed to rt and stirred for 1 h. After cooling back to 0 °C, the bisamidine substrate (150 mg, 0.7 mmol) was added and the reaction stirred for 1 h before warming to rt and stirring for an additional 17 h. Removal of the solvent afforded the product as a light tan solid (188 mg, 94%): mp: >250 °C; <sup>1</sup>H NMR (500 MHz, DMSO-*d*<sub>6</sub>) δ 11.13 (bs, 4H), 9.20 (s, 1H), 8.46 (bs, 2H), 7.92 (bs, 1H), 4.05 (bs, 8H); <sup>13</sup>C NMR (500 MHz, DMSO-*d*<sub>6</sub>) δ 163.8, 133.8, 130.1, 130.0, 122.8, 44.5; IR (film) 3393, 1638, 1615, 1586, 1286 cm<sup>-1</sup>.

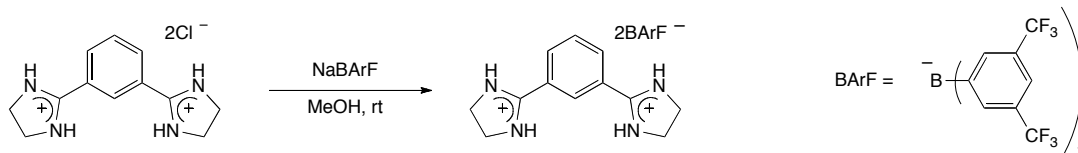

#### Bisamidinium BArFate.

A dry flask was charged with bisamidinium chloride substrate (26 mg, 0.089 mmol), sodium tetrakis[3,5-bis(trifluoromethyl)phenyl]borate<sup>5</sup> (150 mg, 0.169 mmol), and dry MeOH (1.5 mL). After stirring at rt for 21 h, the solvent was removed and dry CH<sub>2</sub>Cl<sub>2</sub> (~2 mL) was added. The resulting mixture was passed through a plug of Celite and concentrated *in vacuo* to afford the product as a tan solid (157 mg, 96%): mp: 195-199 °C (dec); <sup>1</sup>H NMR (500 MHz, Acetone-*d*<sub>6</sub>) δ 10.09 (b, 4H), 8.83 (s, 1H), 8.44 (d, *J* = 8.0 Hz, 2H), 8.05 (t, *J* = 7.9 Hz, 1H), 7.79 (s, 16H), 7.67 (s, 8H), 4.39 (s, 8H); <sup>13</sup>C NMR (125 MHz, Acetone-*d*<sub>6</sub>) δ 166.6, 162.7 (q, *J* = 50.0 Hz), 135.6, 135.1, 132.0, 130.1 (qq, *J* = 31.5, 2.7 Hz), 129.7, 125.4 (q, *J* = 272 Hz), 124.8, 118.5 (t, *J* = 3.7 Hz), 46.4; IR (film) 3460, 3237, 2998, 1357, 1279, 1124, 888 cm<sup>-1</sup>.

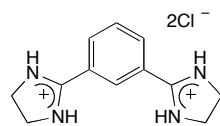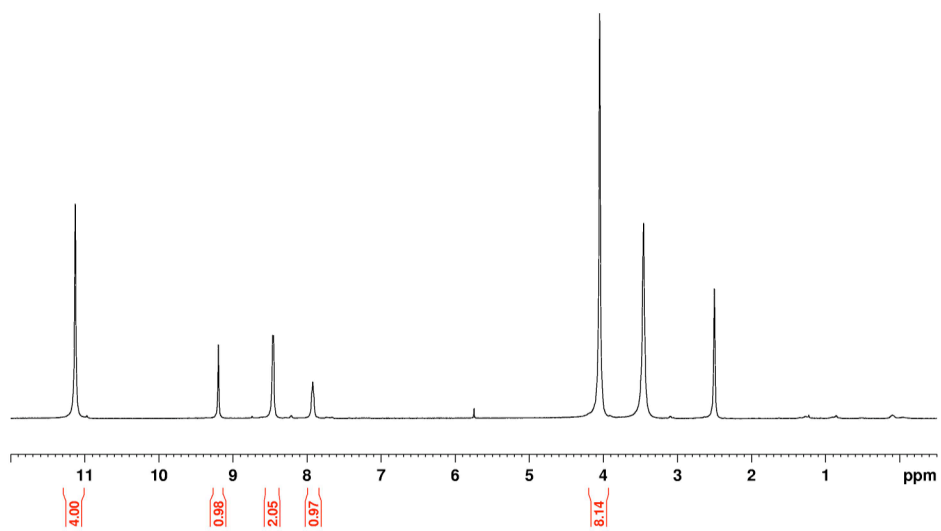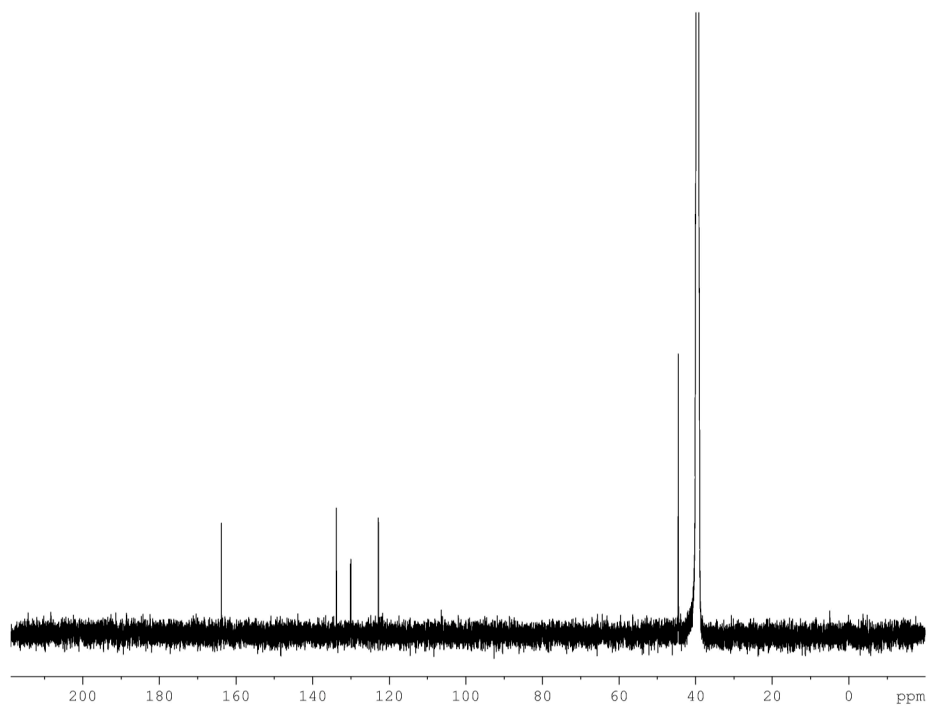

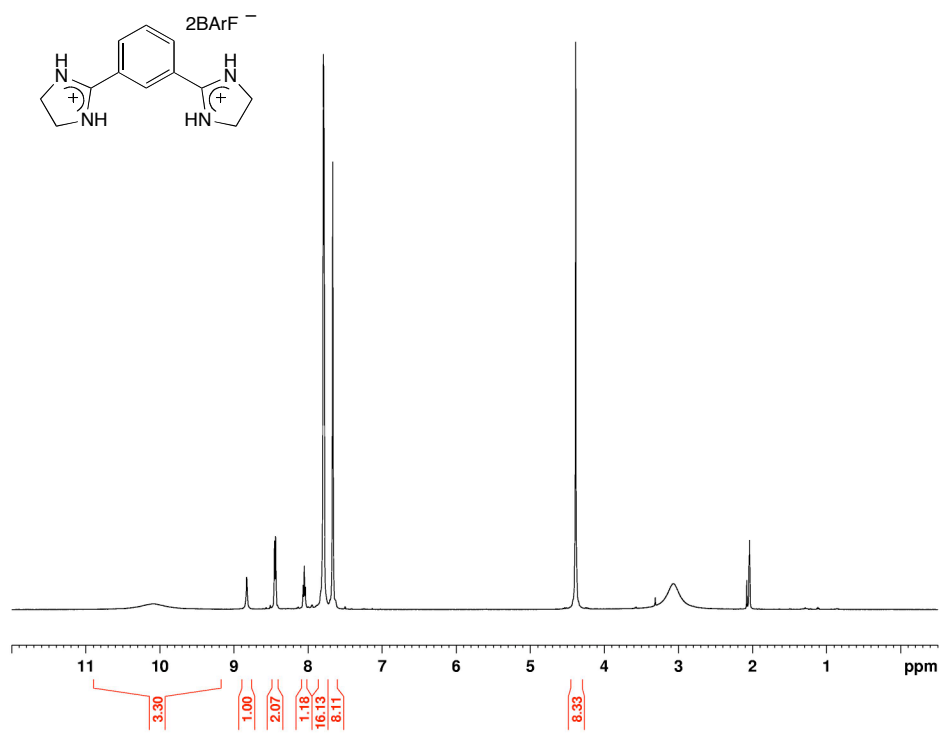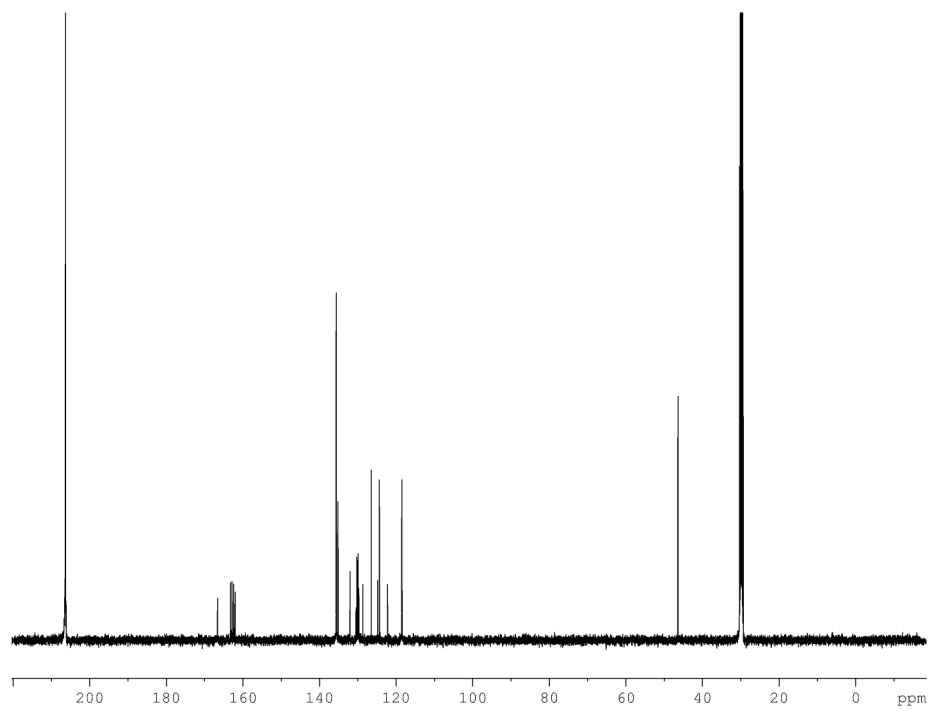

#### 4. UV titration of sensor with different catalysts

##### General procedure

An oven-dried 10 mL volumetric flask was charged with sensor **1** (10.0 mg,  $4.44 \times 10^{-2}$  mmol) and diluted to the line with dichloromethane. The  $2.22 \times 10^{-5}$  M stock solution was prepared by transferring 50  $\mu$ L of this initial solution to another 10 mL volumetric flask and diluting to the line with dichloromethane. For each UV titration experiment, 0.50 mL of the stock sensor solution was transferred to the UV cuvette.

To a Spectrosil Quartz Starna cell 2x10 mm, 0.50 mL of the  $2.22 \times 10^{-5}$  M sensor stock solution was added and the level of the solution was demarcated. Aliquots of the catalyst stock solution were sequentially added and the initial 0.5 mL volume was maintained by evaporation under an argon balloon to the demarcated line. The spectrum was measured after each addition and the  $\lambda_{\max}$  was recorded. Aliquots of the catalyst stock solution were added until the  $\lambda_{\max}$  did not change further. The titration curves of sensor with different catalysts were made by plotting the  $\lambda_{\max}$  vs the concentration of catalyst added.

##### *N,N'*-diphenylthiourea (**2**)

To a oven-dried 2-dram vial, compound **2** (126.7 mg, 0.555 mmol) was added, followed by 3.0 mL dichloromethane to give a compound **2** stock solution of 0.185 M. The titration curve of compound **2** was made by adding 30.0  $\mu$ L aliquots to the sensor solution (0.50 mL) in the UV cell, evaporating to constant volume (0.50 mL) with Ar, and recording the  $\lambda_{\max}$ . Each addition increased the concentration of catalyst in the solution by  $11.1 \times 10^{-3}$  M.

| equiv catalyst | [catalyst] ( $10^{-3}$ M) | $\lambda_{\max}$ (nm) |
|----------------|---------------------------|-----------------------|
| 0              | 0                         | 498.6                 |
| 500            | 11.1                      | 497.4                 |
| 1000           | 22.2                      | 496.8                 |
| 1500           | 33.3                      | 496                   |
| 2000           | 44.4                      | 495.6                 |
| 2500           | 55.5                      | 494.6                 |
| 3000           | 66.6                      | 493.6                 |
| 3500           | 77.7                      | 493.6                 |
| 4000           | 88.8                      | 493.2                 |
| 4500           | 99.9                      | 492.4                 |
| 5000           | 111                       | 492                   |
| 5500           | 122.1                     | 491.2                 |
| 6000           | 133.2                     | 490.2                 |
| 6500           | 144.3                     | 490.8                 |
| 7000           | 155.4                     | 490.2                 |
| 7500           | 166.5                     | 490                   |
| 8000           | 177.6                     | 490                   |

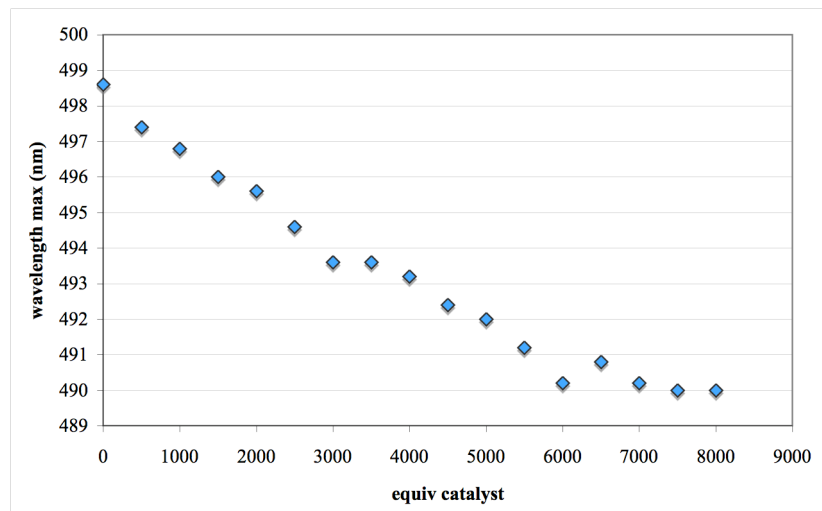

### (R)-BINOL (3)

To an oven-dried 2-dram vial, compound **3** (158.9 mg, 0.555 mmol) was added, followed by 2 mL dichloromethane to give a compound **3** stock solution of 0.277 M. The titration curve of compound **3** was made by adding 20.0  $\mu\text{L}$  aliquots to the sensor solution (0.50 mL) in the UV cell, evaporating to constant volume (0.50 mL) with Ar, and recording the  $\lambda_{\text{max}}$ . Each addition increased the concentration of catalyst in the solution by  $11.1 \times 10^{-3}$  M.

| equiv catalyst | [catalyst] ( $10^{-3}$ M) | $\lambda_{\text{max}}$ (nm) |
|----------------|---------------------------|-----------------------------|
| 0              | 0                         | 499.2                       |
| 500            | 11.1                      | 496.8                       |
| 1000           | 22.2                      | 494.6                       |
| 1500           | 33.3                      | 492.2                       |
| 2000           | 44.4                      | 491.4                       |
| 2500           | 55.5                      | 490.4                       |
| 3000           | 66.6                      | 489.4                       |
| 3500           | 77.7                      | 488.6                       |
| 4000           | 88.8                      | 488.8                       |
| 4500           | 99.9                      | 488                         |
| 5000           | 111                       | 488                         |
| 5500           | 122.1                     | 487.8                       |
| 6000           | 133.2                     | 487.2                       |
| 6500           | 144.3                     | 487.4                       |
| 7000           | 155.4                     | 487                         |
| 7500           | 166.5                     | 486.6                       |
| 8000           | 177.6                     | 486.6                       |

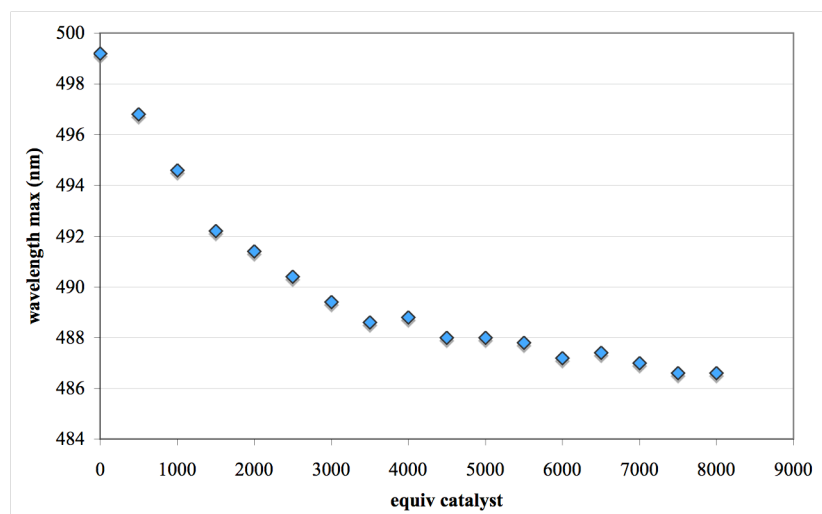

#### *N,N'*-di(3,5-bis(trifluoromethyl)phenyl)thiourea (**4**)

To a flame-dried 2-dram vial, compound **4** (5.6 mg,  $11.1 \times 10^{-3}$  mmol) was added, followed by 0.80 mL dichloromethane to give a compound **4** stock solution of  $14.0 \times 10^{-3}$  M. The titration curve of compound **4** was made by adding 4.0  $\mu$ L aliquots 10 times, increasing the concentration of catalyst by  $0.111 \times 10^{-3}$  M with each addition, followed by 20  $\mu$ L aliquots, increasing the concentration of catalyst by  $0.555 \times 10^{-3}$  M with each addition, until the  $\lambda_{\max}$  did not change further not changed. The  $\lambda_{\max}$  was recorded after evaporation with Ar to a constant volume (0.50 mL) subsequent to each addition.

| equiv catalyst | [catalyst] ( $10^{-3}$ M) | $\lambda_{\max}$ (nm) |
|----------------|---------------------------|-----------------------|
| 0              | 0                         | 498.6                 |
| 5              | 0.111                     | 499                   |
| 10             | 0.222                     | 495.6                 |
| 15             | 0.333                     | 493.8                 |
| 20             | 0.444                     | 491.2                 |
| 25             | 0.555                     | 488.2                 |
| 30             | 0.666                     | 487.2                 |
| 35             | 0.777                     | 485.2                 |
| 40             | 0.888                     | 484.4                 |
| 45             | 0.999                     | 483.2                 |
| 50             | 1.11                      | 483                   |
| 75             | 1.665                     | 480.8                 |
| 100            | 2.22                      | 479.8                 |
| 125            | 2.775                     | 479.4                 |
| 150            | 3.33                      | 478.8                 |
| 175            | 3.885                     | 478.4                 |
| 200            | 4.44                      | 478.4                 |
| 225            | 4.995                     | 478                   |
| 250            | 5.55                      | 477.8                 |
| 275            | 6.105                     | 477.8                 |
| 300            | 6.66                      | 477.6                 |
| 325            | 7.215                     | 477.4                 |
| 350            | 7.77                      | 477.4                 |



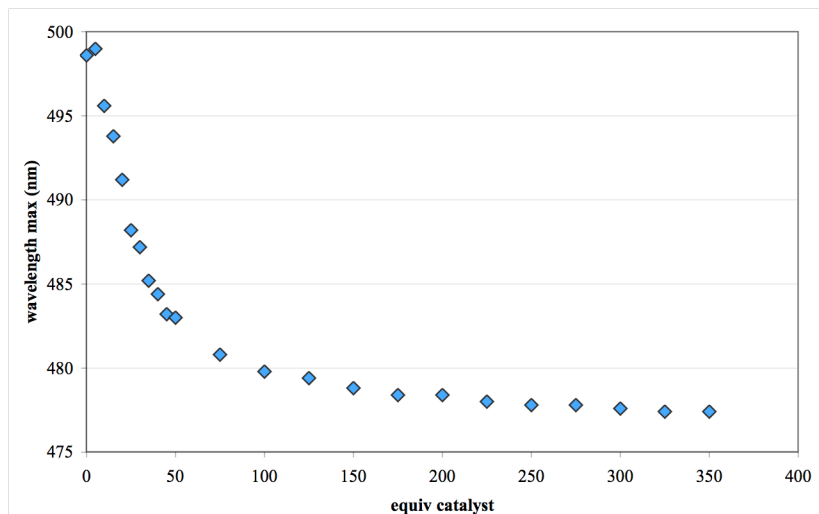

### Monoaminidium BArFate salt (**5**)

To a flame-dried 2-dram vial, compound **5** (5.6 mg,  $5.54 \times 10^{-3}$  mmol) was added, followed by 0.4 mL dichloromethane to give a compound **5** stock solution of  $13.9 \times 10^{-3}$  M. The titration curve of compound **5** was made by adding 4.0  $\mu$ L aliquots 10 times, increasing the concentration of catalyst by  $0.111 \times 10^{-3}$  M with each addition, followed by 20  $\mu$ L aliquots, increasing the concentration of catalyst by  $0.555 \times 10^{-3}$  M with each addition, until the  $\lambda_{\max}$  did not change further not changed. The  $\lambda_{\max}$  was recorded after evaporation with Ar to a constant volume (0.50 mL) subsequent to each addition.

| equiv catalyst | [catalyst] ( $10^{-3}$ M) | $\lambda_{\max}$ (nm) |
|----------------|---------------------------|-----------------------|
| 0              | 0                         | 498.8                 |
| 5              | 0.111                     | 495.4                 |
| 10             | 0.222                     | 490.6                 |
| 15             | 0.333                     | 485                   |
| 20             | 0.444                     | 482.8                 |
| 25             | 0.555                     | 480.8                 |
| 30             | 0.666                     | 479.6                 |
| 35             | 0.777                     | 478.8                 |
| 40             | 0.888                     | 478.2                 |
| 45             | 0.999                     | 477.6                 |
| 50             | 1.11                      | 477.4                 |
| 75             | 1.665                     | 475.2                 |
| 100            | 2.22                      | 474.6                 |
| 125            | 2.775                     | 473.8                 |
| 150            | 3.33                      | 473.6                 |
| 175            | 3.885                     | 473.4                 |
| 200            | 4.44                      | 473                   |
| 225            | 4.995                     | 473                   |
| 250            | 5.55                      | 473                   |

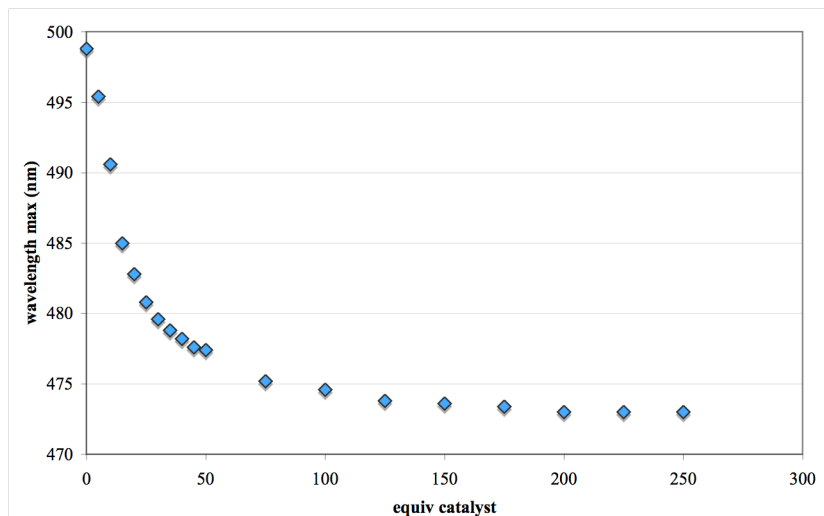

### Bisamidinium BArFate salt (**6**)

To an oven-dried 2-dram vial, compound **6** (4.3 mg,  $2.21 \times 10^{-3}$  mmol) was added, followed by 1.0 mL dichloromethane to give a  $2.21 \times 10^{-3}$  stock solution (S1). A  $1.11 \times 10^{-4}$  M stock solution of compound **6** (S2) was prepared by adding 50.0  $\mu$ L of S1 and diluting to 1.0 mL with dichloromethane. The titration curve of compound **6** was made by adding 10.0  $\mu$ L aliquots of S2 to the sensor solution (0.50 mL) in the UV cell, evaporating to constant volume (0.50 mL) with Ar, and recording the  $\lambda_{\max}$ . Each addition increased the concentration of catalyst in the solution by  $0.00222 \times 10^{-3}$  M. Additional points were made by adding 20.0  $\mu$ L of S2 (1.2-2 equiv catalyst) or 5.0-100.0  $\mu$ L of S1 (3-30 equiv catalyst), appropriately.

| equiv catalyst | [catalyst] ( $10^{-3}$ M) | $\lambda_{\max}$ (nm) |
|----------------|---------------------------|-----------------------|
| 0              | 0                         | 498.2                 |
| 0.1            | 0.00222                   | 497.2                 |
| 0.2            | 0.00444                   | 496.4                 |
| 0.3            | 0.00666                   | 494.6                 |
| 0.4            | 0.00888                   | 493.2                 |
| 0.5            | 0.0111                    | 489.2                 |
| 0.6            | 0.01332                   | 482.8                 |
| 0.7            | 0.01554                   | 479.8                 |
| 0.8            | 0.01776                   | 476.6                 |
| 0.9            | 0.01998                   | 473.3                 |
| 1              | 0.0222                    | 473                   |
| 1.2            | 0.02664                   | 471.2                 |
| 1.4            | 0.03108                   | 469.8                 |
| 1.6            | 0.03552                   | 468.8                 |
| 1.8            | 0.03996                   | 468.6                 |
| 2              | 0.0444                    | 468                   |
| 3              | 0.0666                    | 466.4                 |
| 4              | 0.0888                    | 466                   |
| 6              | 0.1332                    | 465.4                 |
| 8              | 0.1776                    | 465.2                 |
| 10             | 0.222                     | 465                   |
| 15             | 0.333                     | 464.8                 |
| 20             | 0.444                     | 464.6                 |
| 30             | 0.666                     | 464.6                 |

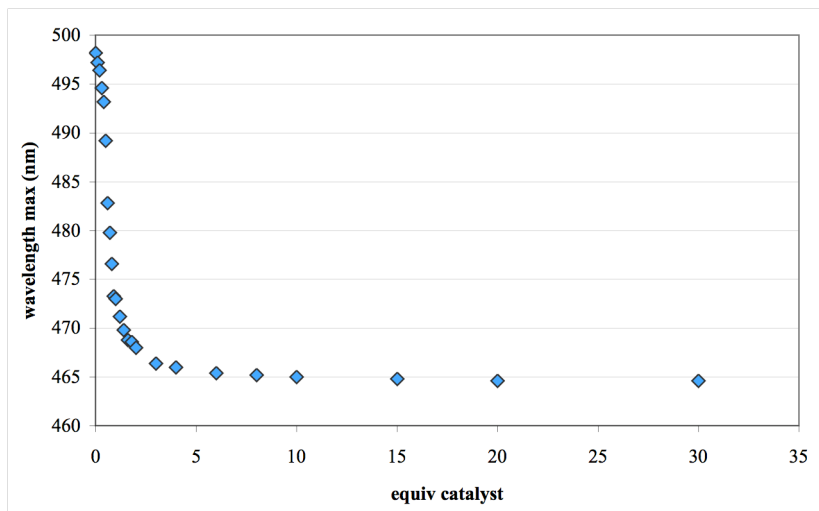

### Calculation of the equilibrium constants ( $K_{eq}$ )

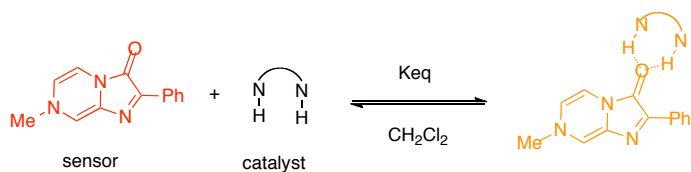

The equilibrium constants were calculated based on the equivalence points and the end points, which were determined from the UV titration curves.

$$K_{eq} = \frac{[\text{sensor} \bullet \text{catalyst}]}{[\text{sensor}] \bullet [\text{catalyst}]} \quad (1)$$

$$[\text{sensor} \bullet \text{catalyst}] + [\text{sensor}] = [\text{sensor}]_{\text{total}}$$

$$[\text{catalyst}] + [\text{sensor} \bullet \text{catalyst}] = [\text{catalyst}]_{\text{total}}$$

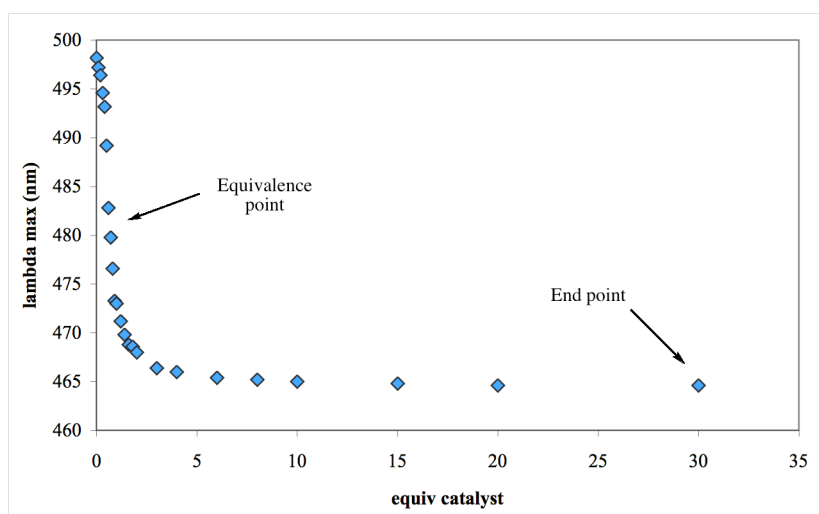

At the end point, all of the sensor is bound in the sensor•catalyst complex. At the equivalence point, half of the sensor is bound with the catalyst and half is unbound.

$$\text{Equation (1) became: } K_{\text{eq}} = \frac{[\text{sensor} \bullet \text{catalyst}]_{\text{eq}}}{[\text{sensor}]_{\text{eq}} \bullet [\text{catalyst}]_{\text{eq}}} \quad (2)$$

In this equation:  $[\text{sensor} \bullet \text{catalyst}]_{\text{eq}}$  is the concentration of sensor•catalyst complex at the equivalence point

$[\text{sensor}]_{\text{eq}}$  is the concentration of sensor at the equivalence point

$[\text{catalyst}]_{\text{eq}}$  is the concentration of catalyst at the equivalence point

$$[\text{sensor} \bullet \text{catalyst}]_{\text{eq}} + [\text{sensor}]_{\text{eq}} = [\text{sensor}]_{\text{total}} = 0.022 \times 10^{-3} \text{ M}$$

$$[\text{sensor} \bullet \text{catalyst}]_{\text{eq}} = [\text{sensor}]_{\text{eq}} = 0.011 \times 10^{-3} \text{ M}$$

$$[\text{catalyst}]_{\text{eq}} + [\text{sensor} \bullet \text{catalyst}]_{\text{eq}} = [\text{catalyst}]_{\text{total}}$$

$$[\text{catalyst}]_{\text{eq}} = ([\text{catalyst}]_{\text{total}} - [\text{sensor} \bullet \text{catalyst}]_{\text{eq}}) = [\text{catalyst}]_{\text{total}} - 0.011 \times 10^{-3} \text{ (M)}$$

Substitute into equation (2)

$$K_{\text{eq}} = \frac{1}{[\text{catalyst}]_{\text{eq}}} \text{ (M}^{-1}\text{)}$$

| Catalyst                                                | $[\text{catalyst}]_{\text{total}}$ (M) | $[\text{catalyst}]_{\text{eq}}$ (M) | $K_{\text{eq}}$    |
|---------------------------------------------------------|----------------------------------------|-------------------------------------|--------------------|
| <i>N,N'</i> -diphenylthiourea                           | $5.99 \times 10^{-2}$                  | $5.99 \times 10^{-2}$               | $1.67 \times 10$   |
| <i>R</i> -BINOL                                         | $3.11 \times 10^{-2}$                  | $3.11 \times 10^{-2}$               | $3.22 \times 10$   |
| <i>N,N'</i> -di(3,5-bis(trifluoromethyl)phenyl)thiourea | $5.77 \times 10^{-4}$                  | $5.66 \times 10^{-4}$               | $1.77 \times 10^3$ |
| Monoaminidinium BARFate salt                            | $3.11 \times 10^{-4}$                  | $3.00 \times 10^{-4}$               | $3.34 \times 10^3$ |
| Bisamidinium BARFate salt                               | $1.40 \times 10^{-5}$                  | $2.89 \times 10^{-6}$               | $3.47 \times 10^5$ |

## 5. Rate measurements of Diels-Alder reactions of methyl vinyl ketone (MVK) and cyclopentadiene (Cp) with different catalysts

### General procedure

All reagents (MVK and Cp) and internal standard (toluene) were freshly distilled before using for the reaction. All reactions were conducted with 0.1 M of MVK, 1 M (10 equiv.) of Cp, 0.1 M of internal standard and 1 mol % catalyst loading unless stated otherwise. Stocks solutions of MVK (0.75 M), Cp (7.5 M), toluene (0.75 M) and the catalysts (0.0075 M) in deuterated benzene were prepared in flame dried vials. An NMR tube was charged with 0.35 mL deuterated benzene followed by 0.10 mL of toluene solution, 0.10 mL MVK solution and 0.10 mL of catalyst solution. After adding 0.10 mL Cp solution, the solutions were mixed. The first NMR spectrum was taken after 6 minutes after the addition of Cp and additional NMR spectra were recorded every 5 minutes for 95 minutes. The methyl peak of toluene (2.12, s, 3H) was calibrated as 100. The methyl peaks of the exo product and MVK, which overlapped (1.75, s, 3H), the methyl peak of endo product (1.71, s, 3H), and the vinyl peak of MVK (5.20, d,  $J = 10$  Hz, 1H) were integrated. The integration of the methyl peak of the exo product was calculated by subtracting three times the vinyl peak from the total of the peak from the overlapping exo product and MVK methyl signals (in the tables below corresponds to: column6 = column4 – 3\*column3). The concentration of the

product (total of the endo and exo products) was calculated based on the known concentration of internal standard (toluene) in the reaction using:

$$[\text{product}] = \{(\text{endo Me} + \text{exo Me})/100\} \times [\text{toluene}].$$

The concentration of MVK at each time point was calculated by subtracting the concentration of product from 0.1 M. The  $k_{\text{obs}}$  of each reactions was determine using the slope of the plot of the  $\ln(0.1 - [\text{product}])$  vs time. Most catalysts were subject to 2 trials and the reported  $k_{\text{obs}}$  is the average of the  $k_{\text{obs}}$  values from the 2 trials.

### Background reaction (uncatalyzed reaction)

For the background reaction, 0.10 mL of deuterated benzene was added instead of 0.10 mL of catalyst solution.

Trial 1

| Time (s) | Time (min) | MVK vinyl(1H) | MVK + product (3H) | exoEndo Me product (3H) | Exo product Me (3H) | Me [product] (M) | 0.1-[product] (M) | $\ln(0.1-[\text{product}])$ |
|----------|------------|---------------|--------------------|-------------------------|---------------------|------------------|-------------------|-----------------------------|
| 360      | 6          | 33            | 106                | 7                       | 7                   | 0.0105           | 0.0895            | -2.414                      |
| 660      | 11         | 33            | 105                | 8                       | 6                   | 0.0105           | 0.0895            | -2.414                      |
| 960      | 16         | 32            | 103                | 10                      | 7                   | 0.0128           | 0.0873            | -2.439                      |
| 1260     | 21         | 30            | 99                 | 13                      | 9                   | 0.0165           | 0.0835            | -2.483                      |
| 1560     | 26         | 30            | 98                 | 16                      | 8                   | 0.0180           | 0.0820            | -2.501                      |
| 1860     | 31         | 29            | 96                 | 17                      | 9                   | 0.0195           | 0.0805            | -2.519                      |
| 2160     | 36         | 28            | 94                 | 19                      | 10                  | 0.0218           | 0.0783            | -2.548                      |
| 2460     | 41         | 27            | 92                 | 22                      | 11                  | 0.0248           | 0.0753            | -2.587                      |
| 2760     | 46         | 27            | 90                 | 23                      | 9                   | 0.0240           | 0.0760            | -2.577                      |
| 3060     | 51         | 26            | 88                 | 25                      | 10                  | 0.0263           | 0.0738            | -2.607                      |
| 3360     | 56         | 25            | 86                 | 27                      | 11                  | 0.0285           | 0.0715            | -2.638                      |
| 3660     | 61         | 24            | 84                 | 29                      | 12                  | 0.0308           | 0.0693            | -2.670                      |
| 3960     | 66         | 24            | 83                 | 31                      | 11                  | 0.0315           | 0.0685            | -2.681                      |
| 4260     | 71         | 23            | 81                 | 32                      | 12                  | 0.0330           | 0.0670            | -2.703                      |
| 4560     | 76         | 22            | 79                 | 34                      | 13                  | 0.0353           | 0.0648            | -2.737                      |
| 4860     | 81         | 22            | 77                 | 36                      | 11                  | 0.0353           | 0.0648            | -2.737                      |
| 5160     | 86         | 21            | 76                 | 37                      | 13                  | 0.0375           | 0.0625            | -2.773                      |
| 5460     | 91         | 20            | 75                 | 38                      | 15                  | 0.0398           | 0.0603            | -2.809                      |
| 5760     | 96         | 20            | 73                 | 40                      | 13                  | 0.0398           | 0.0603            | -2.809                      |
| 6060     | 101        | 19            | 72                 | 41                      | 15                  | 0.0420           | 0.0580            | -2.847                      |

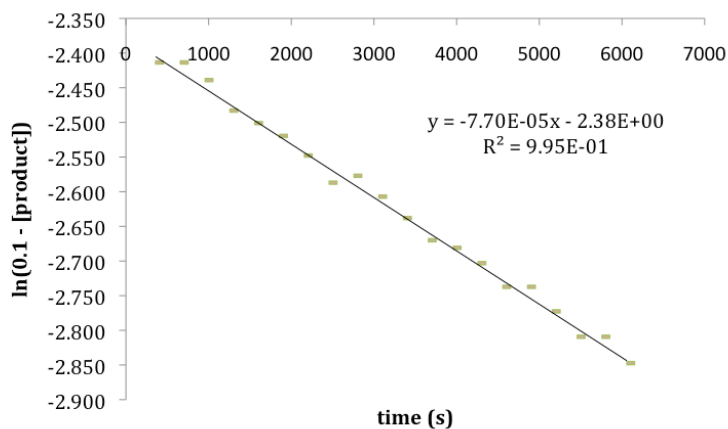

Trial 2

| Time (s) | Time (min) | MVK vinyl(1H) | MVK + exo product Me (3H) | Endo product Me (3H) | Exo product Me (3H) | [product] (M) | 0.1-[product] (M) | ln(0.1-[product]) |
|----------|------------|---------------|---------------------------|----------------------|---------------------|---------------|-------------------|-------------------|
| 360      | 6          | 32            | 102                       | 6                    | 6                   | 0.0090        | 0.0910            | -2.397            |
| 660      | 11         | 31            | 100                       | 8                    | 7                   | 0.0113        | 0.0888            | -2.422            |
| 960      | 16         | 30            | 97                        | 11                   | 7                   | 0.0135        | 0.0865            | -2.448            |
| 1260     | 21         | 29            | 95                        | 13                   | 8                   | 0.0158        | 0.0843            | -2.474            |
| 1560     | 26         | 28            | 93                        | 15                   | 9                   | 0.0180        | 0.0820            | -2.501            |
| 1860     | 31         | 27            | 91                        | 17                   | 10                  | 0.0203        | 0.0798            | -2.529            |
| 2160     | 36         | 27            | 89                        | 19                   | 8                   | 0.0203        | 0.0798            | -2.529            |
| 2460     | 41         | 26            | 87                        | 21                   | 9                   | 0.0225        | 0.0775            | -2.557            |
| 2760     | 46         | 25            | 85                        | 23                   | 10                  | 0.0248        | 0.0753            | -2.587            |
| 3060     | 51         | 24            | 83                        | 25                   | 11                  | 0.0270        | 0.0730            | -2.617            |
| 3360     | 56         | 23            | 81                        | 26                   | 12                  | 0.0285        | 0.0715            | -2.638            |
| 3660     | 61         | 23            | 80                        | 28                   | 11                  | 0.0293        | 0.0708            | -2.649            |
| 3960     | 66         | 22            | 78                        | 30                   | 12                  | 0.0315        | 0.0685            | -2.681            |
| 4260     | 71         | 22            | 76                        | 31                   | 10                  | 0.0308        | 0.0693            | -2.670            |
| 4560     | 76         | 21            | 75                        | 33                   | 12                  | 0.0338        | 0.0663            | -2.714            |
| 4860     | 81         | 20            | 73                        | 34                   | 13                  | 0.0353        | 0.0648            | -2.737            |
| 5160     | 86         | 20            | 72                        | 36                   | 12                  | 0.0360        | 0.0640            | -2.749            |
| 5460     | 91         | 19            | 70                        | 37                   | 13                  | 0.0375        | 0.0625            | -2.773            |
| 5760     | 96         | 18            | 69                        | 39                   | 15                  | 0.0405        | 0.0595            | -2.822            |
| 6060     | 101        | 18            | 67                        | 40                   | 13                  | 0.0398        | 0.0603            | -2.809            |

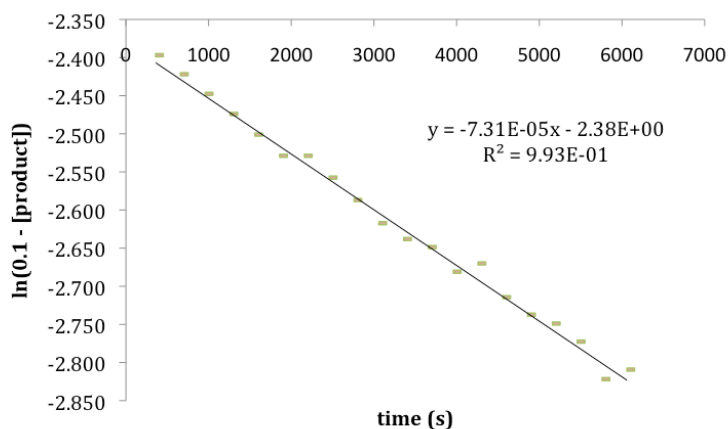

### *N,N'*-diphenylthiourea (2)

This catalyst was used at 10 mol% loading, so the concentration of catalyst stock solution was prepared at 0.0075 M.

#### Trial 1

| Time (s) | Time (min) | MVK vinyl(1H) | MVK + exo product Me (3H) | Endo product Me (3H) | Exo product Me (3H) | [product] (M) | 0.1-[product] (M) | ln(0.1-[product]) |
|----------|------------|---------------|---------------------------|----------------------|---------------------|---------------|-------------------|-------------------|
| 360      | 6          | 36            | 122                       | 7                    | 14                  | 0.0158        | 0.0843            | -2.474            |
| 660      | 11         | 34            | 118                       | 10                   | 16                  | 0.0195        | 0.0805            | -2.519            |
| 960      | 16         | 34            | 117                       | 12                   | 15                  | 0.0203        | 0.0798            | -2.529            |
| 1260     | 21         | 32            | 113                       | 16                   | 17                  | 0.0248        | 0.0753            | -2.587            |
| 1560     | 26         | 31            | 110                       | 18                   | 17                  | 0.0263        | 0.0738            | -2.607            |
| 1860     | 31         | 30            | 107                       | 20                   | 17                  | 0.0278        | 0.0723            | -2.628            |
| 2160     | 36         | 30            | 105                       | 23                   | 15                  | 0.0285        | 0.0715            | -2.638            |
| 2460     | 41         | 29            | 102                       | 25                   | 15                  | 0.0300        | 0.0700            | -2.659            |
| 2760     | 46         | 28            | 99                        | 28                   | 15                  | 0.0323        | 0.0678            | -2.692            |
| 3060     | 51         | 27            | 98                        | 30                   | 17                  | 0.0353        | 0.0648            | -2.737            |
| 3360     | 56         | 26            | 95                        | 32                   | 17                  | 0.0368        | 0.0633            | -2.761            |
| 3660     | 61         | 25            | 93                        | 34                   | 18                  | 0.0390        | 0.0610            | -2.797            |
| 3960     | 66         | 25            | 91                        | 36                   | 16                  | 0.0390        | 0.0610            | -2.797            |
| 4260     | 71         | 24            | 88                        | 38                   | 16                  | 0.0405        | 0.0595            | -2.822            |
| 4560     | 76         | 23            | 86                        | 40                   | 17                  | 0.0428        | 0.0573            | -2.860            |
| 4860     | 81         | 22            | 85                        | 41                   | 19                  | 0.0450        | 0.0550            | -2.900            |
| 5160     | 86         | 22            | 83                        | 44                   | 17                  | 0.0458        | 0.0543            | -2.914            |
| 5460     | 91         | 21            | 81                        | 45                   | 18                  | 0.0473        | 0.0528            | -2.942            |
| 5760     | 96         | 20            | 79                        | 47                   | 19                  | 0.0495        | 0.0505            | -2.986            |
| 6060     | 101        | 20            | 78                        | 49                   | 18                  | 0.0503        | 0.0498            | -3.001            |

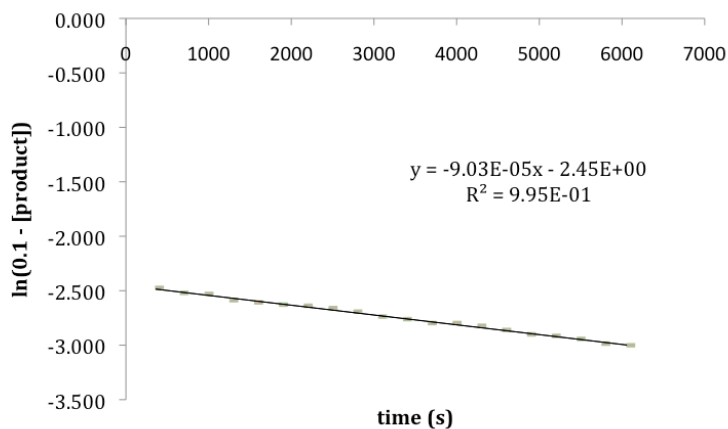

Trial 2

| Time (s) | Time (min) | MVK vinyl(1H) | MVK + exo product Me (3H) | Endo product Me (3H) | Exo product Me (3H) | [product] (M) | 0.1-[product] (M) | ln(0.1-[product]) |
|----------|------------|---------------|---------------------------|----------------------|---------------------|---------------|-------------------|-------------------|
| 360      | 6          | 33            | 108                       | 7                    | 9                   | 0.0120        | 0.0880            | -2.430            |
| 660      | 11         | 32            | 108                       | 8                    | 12                  | 0.0150        | 0.0850            | -2.465            |
| 960      | 16         | 31            | 104                       | 11                   | 11                  | 0.0165        | 0.0835            | -2.483            |
| 1260     | 21         | 30            | 103                       | 13                   | 13                  | 0.0195        | 0.0805            | -2.519            |
| 1560     | 26         | 29            | 100                       | 15                   | 13                  | 0.0210        | 0.0790            | -2.538            |
| 1860     | 31         | 28            | 98                        | 18                   | 14                  | 0.0240        | 0.0760            | -2.577            |
| 2160     | 36         | 27            | 96                        | 20                   | 15                  | 0.0263        | 0.0738            | -2.607            |
| 2460     | 41         | 26            | 93                        | 22                   | 15                  | 0.0278        | 0.0723            | -2.628            |
| 2760     | 46         | 26            | 91                        | 24                   | 13                  | 0.0278        | 0.0723            | -2.628            |
| 3060     | 51         | 25            | 89                        | 26                   | 14                  | 0.0300        | 0.0700            | -2.659            |
| 3360     | 56         | 24            | 87                        | 28                   | 15                  | 0.0323        | 0.0678            | -2.692            |
| 3660     | 61         | 23            | 86                        | 30                   | 17                  | 0.0353        | 0.0648            | -2.737            |
| 3960     | 66         | 23            | 83                        | 32                   | 14                  | 0.0345        | 0.0655            | -2.726            |
| 4260     | 71         | 22            | 82                        | 34                   | 16                  | 0.0375        | 0.0625            | -2.773            |
| 4560     | 76         | 21            | 80                        | 35                   | 17                  | 0.0390        | 0.0610            | -2.797            |
| 4860     | 81         | 20            | 78                        | 37                   | 18                  | 0.0413        | 0.0588            | -2.834            |
| 5160     | 86         | 20            | 76                        | 39                   | 16                  | 0.0413        | 0.0588            | -2.834            |
| 5460     | 91         | 19            | 74                        | 40                   | 17                  | 0.0428        | 0.0573            | -2.860            |
| 5760     | 96         | 18            | 73                        | 42                   | 19                  | 0.0458        | 0.0543            | -2.914            |
| 6060     | 101        | 18            | 72                        | 43                   | 18                  | 0.0458        | 0.0543            | -2.914            |



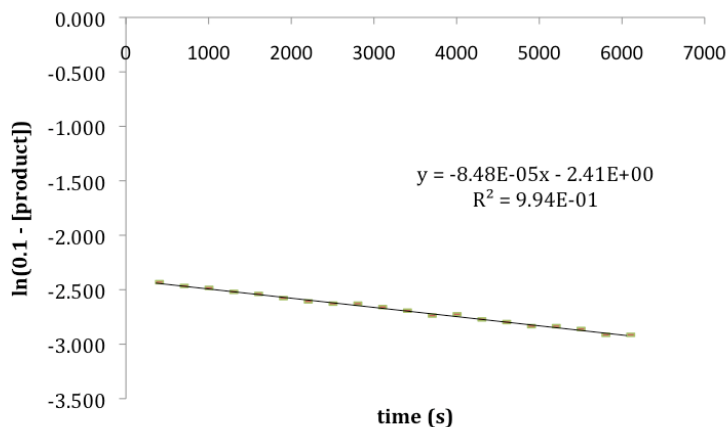

### R-BINOL (3)

Trial 1

| Time (s) | Time (min) | MVK vinyl(1H) | MVK + exo product Me (3H) | Endo product Me (3H) | Exo product Me (3H) | [product] (M) | 0.1-[product] (M) | ln(0.1-[product]) |
|----------|------------|---------------|---------------------------|----------------------|---------------------|---------------|-------------------|-------------------|
| 360      | 6          | 34            | 107                       | 5                    | 5                   | 0.0075        | 0.0925            | -2.381            |
| 660      | 11         | 33            | 104                       | 8                    | 5                   | 0.0098        | 0.0903            | -2.405            |
| 960      | 16         | 31            | 101                       | 10                   | 8                   | 0.0135        | 0.0865            | -2.448            |
| 1260     | 21         | 31            | 100                       | 12                   | 7                   | 0.0143        | 0.0858            | -2.456            |
| 1560     | 26         | 30            | 98                        | 14                   | 8                   | 0.0165        | 0.0835            | -2.483            |
| 1860     | 31         | 29            | 95                        | 17                   | 8                   | 0.0188        | 0.0813            | -2.510            |
| 2160     | 36         | 28            | 93                        | 19                   | 9                   | 0.0210        | 0.0790            | -2.538            |
| 2460     | 41         | 27            | 92                        | 20                   | 11                  | 0.0233        | 0.0768            | -2.567            |
| 2760     | 46         | 26            | 88                        | 22                   | 10                  | 0.0240        | 0.0760            | -2.577            |
| 3060     | 51         | 26            | 86                        | 25                   | 8                   | 0.0248        | 0.0753            | -2.587            |
| 3360     | 56         | 25            | 84                        | 26                   | 9                   | 0.0263        | 0.0738            | -2.607            |
| 3660     | 61         | 24            | 83                        | 28                   | 11                  | 0.0293        | 0.0708            | -2.649            |
| 3960     | 66         | 23            | 80                        | 30                   | 11                  | 0.0308        | 0.0693            | -2.670            |
| 4260     | 71         | 23            | 79                        | 31                   | 10                  | 0.0308        | 0.0693            | -2.670            |
| 4560     | 76         | 22            | 78                        | 33                   | 12                  | 0.0338        | 0.0663            | -2.714            |
| 4860     | 81         | 21            | 76                        | 34                   | 13                  | 0.0353        | 0.0648            | -2.737            |
| 5160     | 86         | 21            | 75                        | 36                   | 12                  | 0.0360        | 0.0640            | -2.749            |
| 5460     | 91         | 20            | 74                        | 37                   | 14                  | 0.0383        | 0.0618            | -2.785            |
| 5760     | 96         | 19            | 72                        | 39                   | 15                  | 0.0405        | 0.0595            | -2.822            |
| 6060     | 101        | 19            | 71                        | 40                   | 14                  | 0.0405        | 0.0595            | -2.822            |

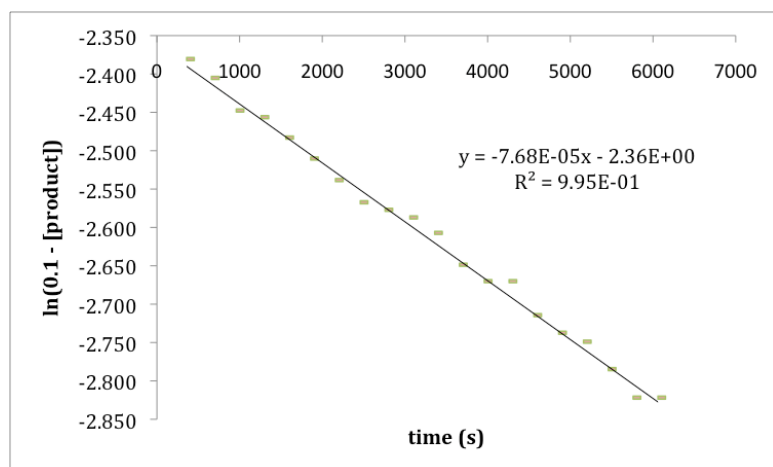

### *N,N'*-di(3,5-bis(trifluoromethyl)phenyl)thiourea (4)

Trial 1

| Time (s) | Time (min) | MVK vinyl(1H) | MVK + exo product Me (3H) | Endo product Me (3H) | Exo product Me (3H) | [product] (M) | 0.1-[product] (M) | ln(0.1-[product]) |
|----------|------------|---------------|---------------------------|----------------------|---------------------|---------------|-------------------|-------------------|
| 360      | 6          | 35            | 110                       | 8                    | 5                   | 0.0098        | 0.0903            | -2.405            |
| 660      | 11         | 34            | 107                       | 11                   | 5                   | 0.0120        | 0.0880            | -2.430            |
| 960      | 16         | 33            | 104                       | 14                   | 5                   | 0.0143        | 0.0858            | -2.456            |
| 1260     | 21         | 31            | 100                       | 17                   | 7                   | 0.0180        | 0.0820            | -2.501            |
| 1560     | 26         | 30            | 98                        | 20                   | 8                   | 0.0210        | 0.0790            | -2.538            |
| 1860     | 31         | 29            | 95                        | 23                   | 8                   | 0.0233        | 0.0768            | -2.567            |
| 2160     | 36         | 28            | 92                        | 25                   | 8                   | 0.0248        | 0.0753            | -2.587            |
| 2460     | 41         | 27            | 90                        | 27                   | 9                   | 0.0270        | 0.0730            | -2.617            |
| 2760     | 46         | 26            | 87                        | 30                   | 9                   | 0.0293        | 0.0708            | -2.649            |
| 3060     | 51         | 25            | 85                        | 32                   | 10                  | 0.0315        | 0.0685            | -2.681            |
| 3360     | 56         | 24            | 83                        | 34                   | 11                  | 0.0338        | 0.0663            | -2.714            |
| 3660     | 61         | 23            | 80                        | 36                   | 11                  | 0.0353        | 0.0648            | -2.737            |
| 3960     | 66         | 22            | 78                        | 38                   | 12                  | 0.0375        | 0.0625            | -2.773            |
| 4260     | 71         | 21            | 76                        | 40                   | 13                  | 0.0398        | 0.0603            | -2.809            |
| 4560     | 76         | 21            | 74                        | 42                   | 11                  | 0.0398        | 0.0603            | -2.809            |
| 4860     | 81         | 20            | 72                        | 44                   | 12                  | 0.0420        | 0.0580            | -2.847            |
| 5160     | 86         | 19            | 71                        | 46                   | 14                  | 0.0450        | 0.0550            | -2.900            |
| 5460     | 91         | 18            | 69                        | 47                   | 15                  | 0.0465        | 0.0535            | -2.928            |
| 5760     | 96         | 18            | 68                        | 49                   | 14                  | 0.0473        | 0.0528            | -2.942            |
| 6060     | 101        | 17            | 65                        | 51                   | 14                  | 0.0488        | 0.0513            | -2.971            |

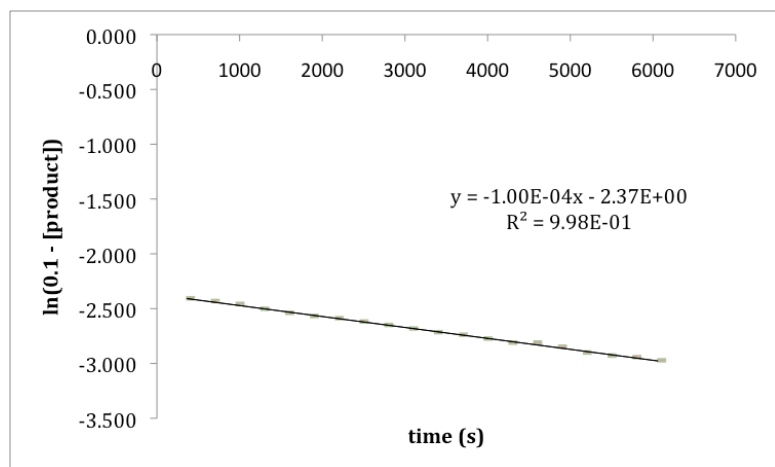

Trial 2

| Time (s) | Time (min) | MVK vinyl(1H) | MVK + exo product Me (3H) | Endo product Me (3H) | Exo product Me (3H) | [product] (M) | 0.1-[product] (M) | ln(0.1-[product]) |
|----------|------------|---------------|---------------------------|----------------------|---------------------|---------------|-------------------|-------------------|
| 360      | 6          | 33            | 103                       | 7                    | 4                   | 0.0083        | 0.0918            | -2.389            |
| 660      | 11         | 32            | 100                       | 9                    | 4                   | 0.0098        | 0.0903            | -2.405            |
| 960      | 16         | 31            | 98                        | 12                   | 5                   | 0.0128        | 0.0873            | -2.439            |
| 1260     | 21         | 29            | 95                        | 15                   | 8                   | 0.0173        | 0.0828            | -2.492            |
| 1560     | 26         | 29            | 93                        | 17                   | 6                   | 0.0173        | 0.0828            | -2.492            |
| 1860     | 31         | 28            | 90                        | 19                   | 6                   | 0.0188        | 0.0813            | -2.510            |
| 2160     | 36         | 27            | 89                        | 21                   | 8                   | 0.0218        | 0.0783            | -2.548            |
| 2460     | 41         | 26            | 85                        | 24                   | 7                   | 0.0233        | 0.0768            | -2.567            |
| 2760     | 46         | 25            | 83                        | 26                   | 8                   | 0.0255        | 0.0745            | -2.597            |
| 3060     | 51         | 24            | 81                        | 29                   | 9                   | 0.0285        | 0.0715            | -2.638            |
| 3360     | 56         | 23            | 79                        | 31                   | 10                  | 0.0308        | 0.0693            | -2.670            |
| 3660     | 61         | 22            | 76                        | 32                   | 10                  | 0.0315        | 0.0685            | -2.681            |
| 3960     | 66         | 21            | 74                        | 35                   | 11                  | 0.0345        | 0.0655            | -2.726            |
| 4260     | 71         | 20            | 73                        | 37                   | 13                  | 0.0375        | 0.0625            | -2.773            |
| 4560     | 76         | 20            | 71                        | 38                   | 11                  | 0.0368        | 0.0633            | -2.761            |
| 4860     | 81         | 19            | 69                        | 40                   | 12                  | 0.0390        | 0.0610            | -2.797            |
| 5160     | 86         | 18            | 67                        | 42                   | 13                  | 0.0413        | 0.0588            | -2.834            |
| 5460     | 91         | 18            | 66                        | 43                   | 12                  | 0.0413        | 0.0588            | -2.834            |
| 5760     | 96         | 17            | 64                        | 45                   | 13                  | 0.0435        | 0.0565            | -2.874            |
| 6060     | 101        | 16            | 63                        | 46                   | 15                  | 0.0458        | 0.0543            | -2.914            |

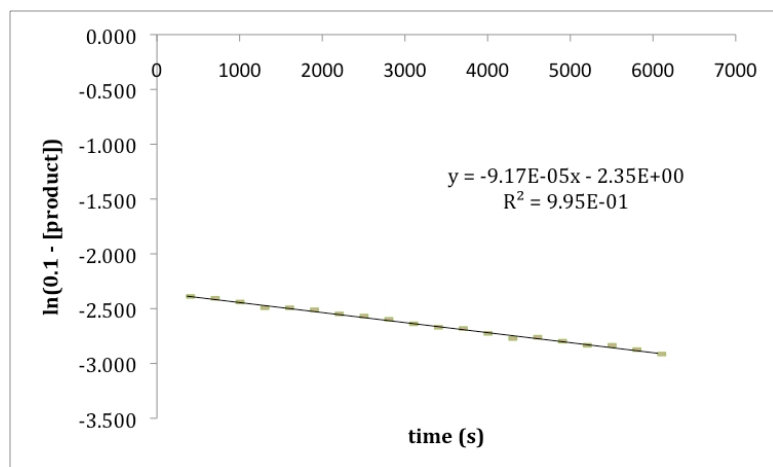

### Monoaminidium BArFate salt (5)

The internal standard was used in the reaction at 0.1 M. The stock solution of toluene in dichloromethane was prepared at 0.075 M.

#### Trial 1

| Time (s) | Time (min) | MVK vinyl(1H) | MVK + exo product Me (3H) | Endo product Me (3H) | Exo product Me (3H) | [product] (M) | 0.1-[product] (M) | ln(0.1-[product]) |
|----------|------------|---------------|---------------------------|----------------------|---------------------|---------------|-------------------|-------------------|
| 360      | 6          | 33            | 107                       | 7                    | 8                   | 0.0150        | 0.0850            | -2.465            |
| 660      | 11         | 32            | 103                       | 10                   | 7                   | 0.0170        | 0.0830            | -2.489            |
| 960      | 16         | 31            | 101                       | 13                   | 8                   | 0.0210        | 0.0790            | -2.538            |
| 1260     | 21         | 30            | 98                        | 15                   | 8                   | 0.0230        | 0.0770            | -2.564            |
| 1560     | 26         | 29            | 96                        | 17                   | 9                   | 0.0260        | 0.0740            | -2.604            |
| 1860     | 31         | 28            | 94                        | 20                   | 10                  | 0.0300        | 0.0700            | -2.659            |
| 2160     | 36         | 27            | 91                        | 22                   | 10                  | 0.0320        | 0.0680            | -2.688            |
| 2460     | 41         | 26            | 89                        | 24                   | 11                  | 0.0350        | 0.0650            | -2.733            |
| 2760     | 46         | 25            | 87                        | 26                   | 12                  | 0.0380        | 0.0620            | -2.781            |
| 3060     | 51         | 24            | 85                        | 28                   | 13                  | 0.0410        | 0.0590            | -2.830            |
| 3360     | 56         | 24            | 83                        | 30                   | 11                  | 0.0410        | 0.0590            | -2.830            |
| 3660     | 61         | 23            | 81                        | 32                   | 12                  | 0.0440        | 0.0560            | -2.882            |
| 3960     | 66         | 22            | 79                        | 33                   | 13                  | 0.0460        | 0.0540            | -2.919            |
| 4260     | 71         | 21            | 77                        | 35                   | 14                  | 0.0490        | 0.0510            | -2.976            |
| 4560     | 76         | 21            | 75                        | 37                   | 12                  | 0.0490        | 0.0510            | -2.976            |
| 4860     | 81         | 20            | 74                        | 38                   | 14                  | 0.0520        | 0.0480            | -3.037            |
| 5160     | 86         | 19            | 72                        | 40                   | 15                  | 0.0550        | 0.0450            | -3.101            |
| 5460     | 91         | 19            | 70                        | 41                   | 13                  | 0.0540        | 0.0460            | -3.079            |
| 5760     | 96         | 18            | 69                        | 43                   | 15                  | 0.0580        | 0.0420            | -3.170            |
| 6060     | 101        | 17            | 67                        | 44                   | 16                  | 0.0600        | 0.0400            | -3.219            |

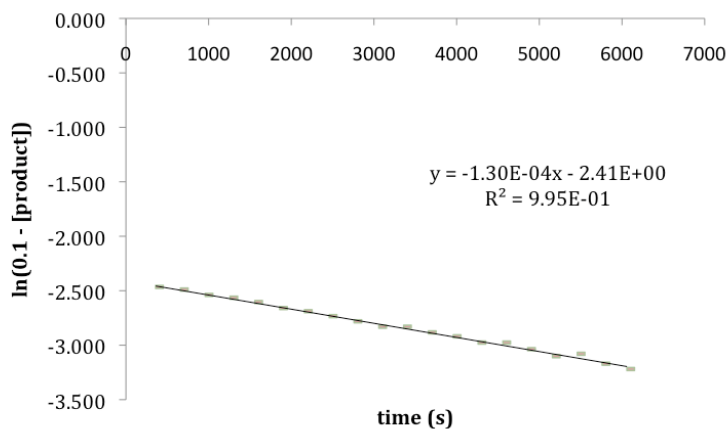

Trial 2

| Time (s) | Time (min) | MVK vinyl(1H) | MVK + exo product Me (3H) | Endo product Me (3H) | Exo product Me (3H) | [product] (M) | 0.1-[product] (M) | ln(0.1-[product]) |
|----------|------------|---------------|---------------------------|----------------------|---------------------|---------------|-------------------|-------------------|
| 360      | 6          | 32            | 105                       | 7                    | 9                   | 0.0160        | 0.0840            | -2.477            |
| 660      | 11         | 31            | 102                       | 9                    | 9                   | 0.0180        | 0.0820            | -2.501            |
| 960      | 16         | 31            | 99                        | 12                   | 6                   | 0.0180        | 0.0820            | -2.501            |
| 1260     | 21         | 29            | 98                        | 14                   | 11                  | 0.0250        | 0.0750            | -2.590            |
| 1560     | 26         | 29            | 96                        | 16                   | 9                   | 0.0250        | 0.0750            | -2.590            |
| 1860     | 31         | 27            | 93                        | 18                   | 12                  | 0.0300        | 0.0700            | -2.659            |
| 2160     | 36         | 27            | 90                        | 21                   | 9                   | 0.0300        | 0.0700            | -2.659            |
| 2460     | 41         | 26            | 89                        | 22                   | 11                  | 0.0330        | 0.0670            | -2.703            |
| 2760     | 46         | 25            | 86                        | 25                   | 11                  | 0.0360        | 0.0640            | -2.749            |
| 3060     | 51         | 24            | 84                        | 26                   | 12                  | 0.0380        | 0.0620            | -2.781            |
| 3360     | 56         | 24            | 82                        | 28                   | 10                  | 0.0380        | 0.0620            | -2.781            |
| 3660     | 61         | 23            | 81                        | 30                   | 12                  | 0.0420        | 0.0580            | -2.847            |
| 3960     | 66         | 22            | 79                        | 32                   | 13                  | 0.0450        | 0.0550            | -2.900            |
| 4260     | 71         | 21            | 77                        | 34                   | 14                  | 0.0480        | 0.0520            | -2.957            |
| 4560     | 76         | 21            | 75                        | 35                   | 12                  | 0.0470        | 0.0530            | -2.937            |
| 4860     | 81         | 20            | 74                        | 37                   | 14                  | 0.0510        | 0.0490            | -3.016            |
| 5160     | 86         | 19            | 72                        | 38                   | 15                  | 0.0530        | 0.0470            | -3.058            |
| 5460     | 91         | 19            | 70                        | 39                   | 13                  | 0.0520        | 0.0480            | -3.037            |
| 5760     | 96         | 18            | 69                        | 41                   | 15                  | 0.0560        | 0.0440            | -3.124            |
| 6060     | 101        | 18            | 67                        | 42                   | 13                  | 0.0550        | 0.0450            | -3.101            |

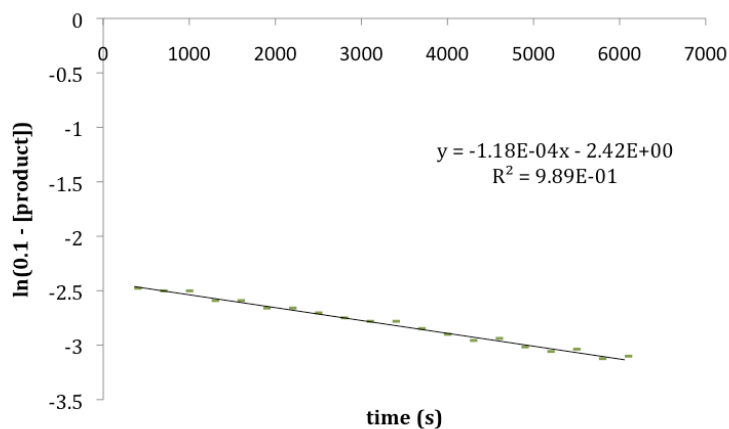

### Bisamidinium BArFate salt (6)

| Time (s) | Time (min) | MVK vinyl(1H) | MVK + exo product Me (3H) | Endo product Me (3H) | Exo product Me (3H) | [product] (M) | 0.1-[product] (M) | ln(0.1-[product]) |
|----------|------------|---------------|---------------------------|----------------------|---------------------|---------------|-------------------|-------------------|
| 360      | 6          | 33            | 104                       | 19                   | 5                   | 0.0180        | 0.0820            | -2.501            |
| 660      | 11         | 30            | 96                        | 26                   | 6                   | 0.0240        | 0.0760            | -2.577            |
| 960      | 16         | 28            | 90                        | 33                   | 6                   | 0.0293        | 0.0708            | -2.649            |
| 1260     | 21         | 25            | 82                        | 40                   | 7                   | 0.0353        | 0.0648            | -2.737            |
| 1560     | 26         | 23            | 77                        | 45                   | 8                   | 0.0398        | 0.0603            | -2.809            |
| 1860     | 31         | 21            | 71                        | 51                   | 8                   | 0.0443        | 0.0558            | -2.887            |
| 2160     | 36         | 19            | 66                        | 56                   | 9                   | 0.0488        | 0.0513            | -2.971            |
| 2460     | 41         | 17            | 61                        | 61                   | 10                  | 0.0533        | 0.0468            | -3.063            |
| 2760     | 46         | 16            | 57                        | 64                   | 9                   | 0.0548        | 0.0453            | -3.096            |
| 3060     | 51         | 14            | 54                        | 68                   | 12                  | 0.0600        | 0.0400            | -3.219            |
| 3360     | 56         | 13            | 50                        | 72                   | 11                  | 0.0623        | 0.0378            | -3.277            |
| 3660     | 61         | 12            | 47                        | 75                   | 11                  | 0.0645        | 0.0355            | -3.338            |
| 3960     | 66         | 11            | 46                        | 80                   | 13                  | 0.0698        | 0.0303            | -3.498            |
| 4260     | 71         | 10            | 43                        | 84                   | 13                  | 0.0728        | 0.0273            | -3.603            |
| 4560     | 76         | 8             | 39                        | 83                   | 15                  | 0.0735        | 0.0265            | -3.631            |
| 4860     | 81         | 8             | 38                        | 88                   | 14                  | 0.0765        | 0.0235            | -3.751            |
| 5160     | 86         | 7             | 34                        | 87                   | 13                  | 0.0750        | 0.0250            | -3.689            |
| 5460     | 91         | 6             | 33                        | 89                   | 15                  | 0.0780        | 0.0220            | -3.817            |
| 5760     | 96         | 6             | 31                        | 90                   | 13                  | 0.0773        | 0.0228            | -3.783            |
| 6060     | 101        | 5             | 29                        | 92                   | 14                  | 0.0795        | 0.0205            | -3.887            |

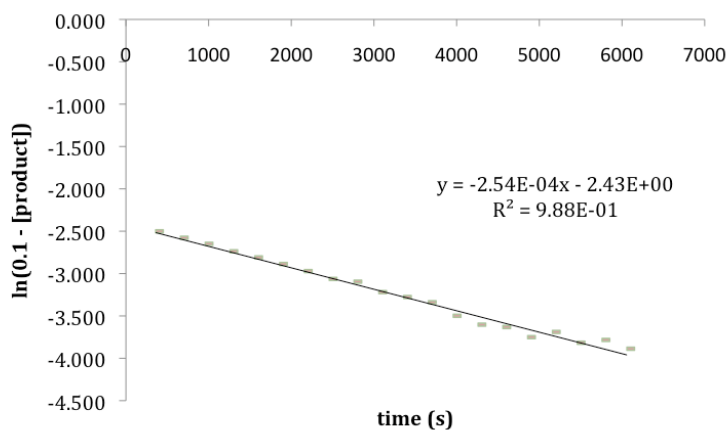

### Equations

Based on the UV measurements:

$$K_{eq} = e^{-\Delta G/RT} \Rightarrow \Delta G \propto \ln(K_{eq})$$

$$E = h\nu, h = \text{Planck constant} \Rightarrow \Delta E = h(\nu_1 - \nu_2) = h(1/\lambda_1 - 1/\lambda_2)$$

$\lambda_1$  = maximum wavelength of the sensor•catalyst complex in dichloromethane (read at the end point of each titrations)

$\lambda_2$  = maximum wavelength of the sensor in dichloromethane (498.6 nm)

Based on the rate measurements:

$$\text{rate} = k_{obs}[\text{cat}]$$

$$\text{Arrhenius equation: } k_{obs} = Ae^{-E_a/RT}$$

$$k_{rel} = k_{cat}/k_{uncat} = Ae^{(E_{a\text{ uncat}} - E_{a\text{ cat}})/RT} \Rightarrow \Delta E_a \propto \ln(k_{rel})$$

$$k_{cat} = k_{obs} - k_{uncat}$$

| catalyst | $\lambda_1$ (nm) | $K_{eq}$ ( $M^{-1}$ ) | $k_{obs}$ ( $10^{-5} s^{-1}$ ) | cat loading | $k_{cat}$ ( $10^{-5} s^{-1}$ ) | $k_{rel}$ | $\Delta(1/\lambda_{max}) \times 10^4$ | $\ln(K_{eq})$ | $\ln(k_{rel})$ |
|----------|------------------|-----------------------|--------------------------------|-------------|--------------------------------|-----------|---------------------------------------|---------------|----------------|
| uncat    |                  |                       | 7.50                           |             |                                |           |                                       |               |                |
| 2        | 490              | $1.67 \times 10$      | 8.76                           | 10          | 0.126                          | 0.0168    | 0.352                                 | 2.815         | -4.086         |
| 3        | 487              | $3.22 \times 10$      | 7.68                           | 1           | 0.180                          | 0.0240    | 0.478                                 | 3.472         | -3.730         |
| 4        | 477              | $1.77 \times 10^3$    | 9.59                           | 1           | 2.09                           | 0.279     | 0.908                                 | 7.477         | -1.278         |
| 5        | 473              | $3.34 \times 10^3$    | 12.4                           | 1           | 4.90                           | 0.653     | 1.09                                  | 8.113         | -0.426         |
| 6        | 465              | $3.47 \times 10^5$    | 25.4                           | 1           | 17.9                           | 2.39      | 1.45                                  | 12.76         | 0.870          |

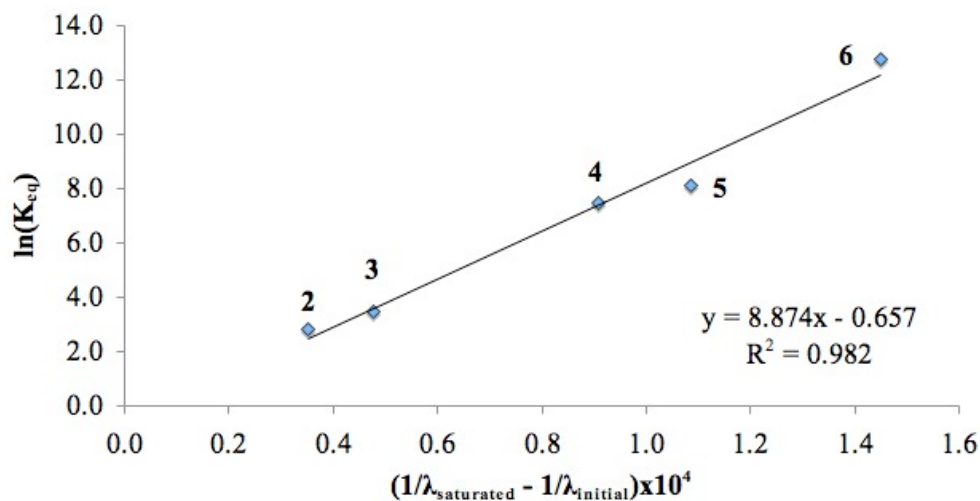

Correlation between wavelength shift and  $K_{eq}$ .

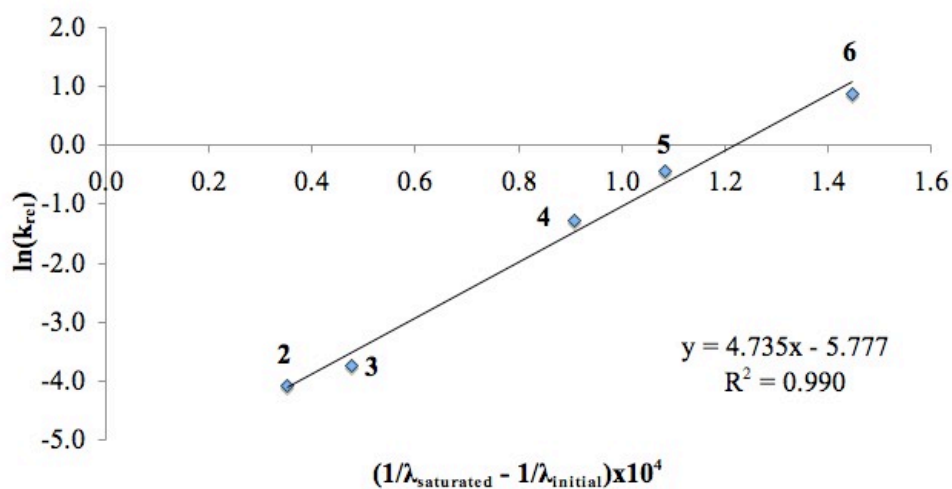

Correlation of Diels-Alder  $k_{rel}$  values from different hydrogen bonding catalysts with their wavelength shifts of sensor 1.

## References

- 1) Barlin, G. B.; Brown, D. J.; Kadunc, Z.; Petric, A.; Stanovik, B.; Tisler, M. *Aust. J. Chem.* **1983**, *36*, 1215-1220
- 2) Nakai, S.; Yasui, M.; Nakazato, M.; Iwasaki, F.; Maki, S.; Niwa, H.; Ohashi, M.; Hirano, T. *Bull. Chem. Jpn.* **2003**, *76*, 2361-2387.
- 3) Natarajan, A.; Guo, Y.; Arthanari, H.; Wagner, G.; Halperin, J. A.; Chorev, M. *J. Org. Chem.* **2005**, *70*, 6362-6368
- 4) Annamalai, V. R.; Linton, E. C.; Kozlowski, M. C. *Org. Lett.* **2009**, *11*, 621-624.
- 5) Zuccaccia, C.; Bellachioma, G.; Cardaci, G.; Macchioni, A. *J. Am. Chem. Soc.* **2001**, *123*, 11020-11028.
